# Supplementary material
Source: PubMed Central journal article supplement (PMC3860306)
Supplement: supp_126.24.5541_JCS115972.pdf [file supp_126.24.5541_JCS115972.pdf]

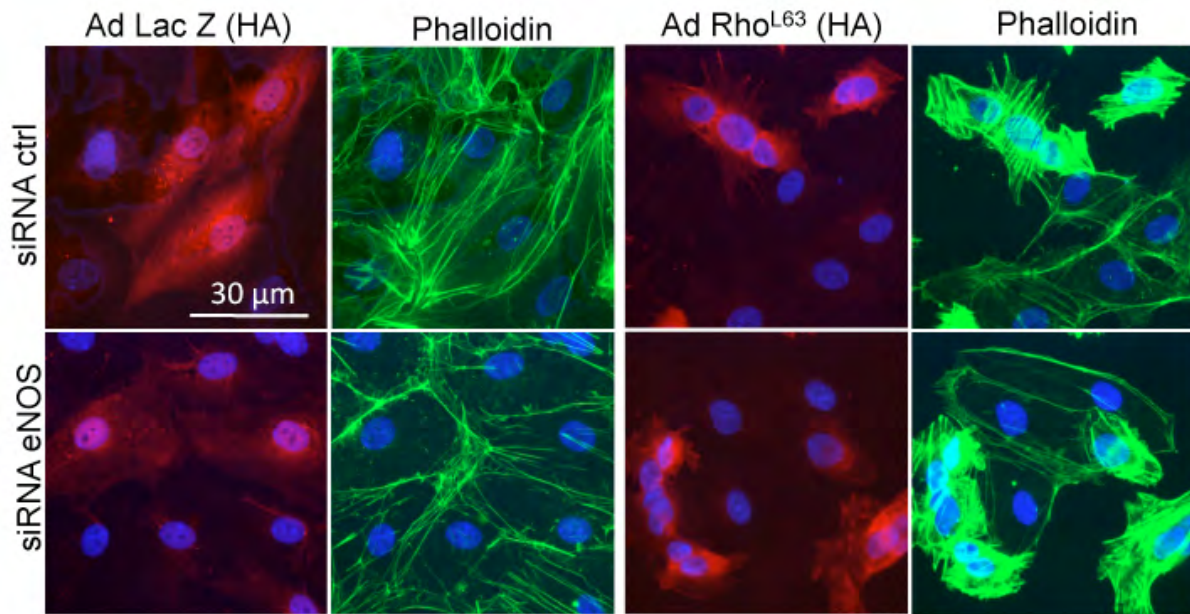

**Fig. S1.** Active Rho induces stress fiber formation in control and eNOS siRNA treated HDMEC. Control and eNOS siRNA treated HDMEC were adenovirally transduced with either the control virus encoding HA-tagged lac Z (Ad  $\beta$ -gal) or HA-tagged, active Rho (Ad Rho<sup>L63</sup>) and stimulated with vehicle or VEGF (100 ng/ml) and labeled with phalloidin to delineate F-actin (green) and HA (red). These figures are representative of three separate experiments.

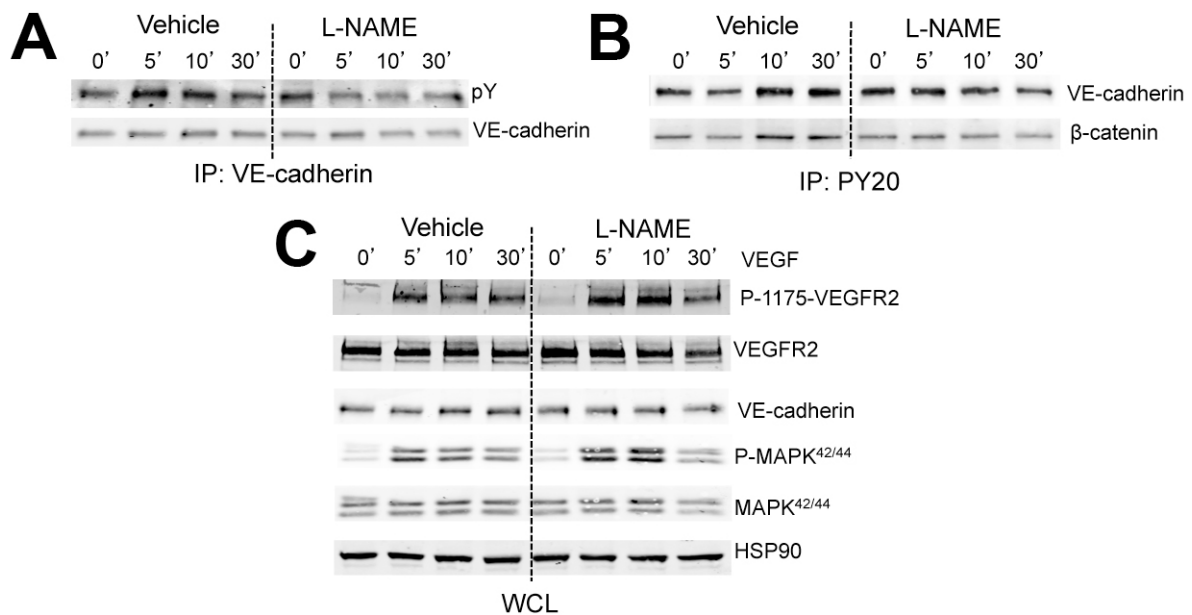

**Fig. S2.** WT and eNOS<sup>-/-</sup> MLEC were serum starved and stimulated with VEGF (100 ng/ml, 15') and stained for phospho-MLC (red).

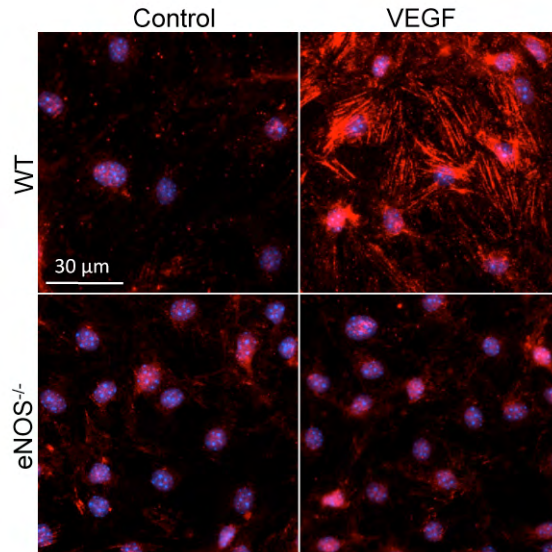

**Fig. S3.** HDMEC treated with L-NAME or vehicle were serum starved and stimulated with VEGF (100 ng/ml) for the indicated times. (A) VE-cadherin or (B) phosphotyrosine immunoprecipitates were analyzed by immunoblotting against phosphorylated tyrosine (4G10, PY20 clone), VE-cadherin and  $\beta$ -catenin. (C) Western blot analysis on whole cell lysates (WCL) from HDMEC treated as above described.

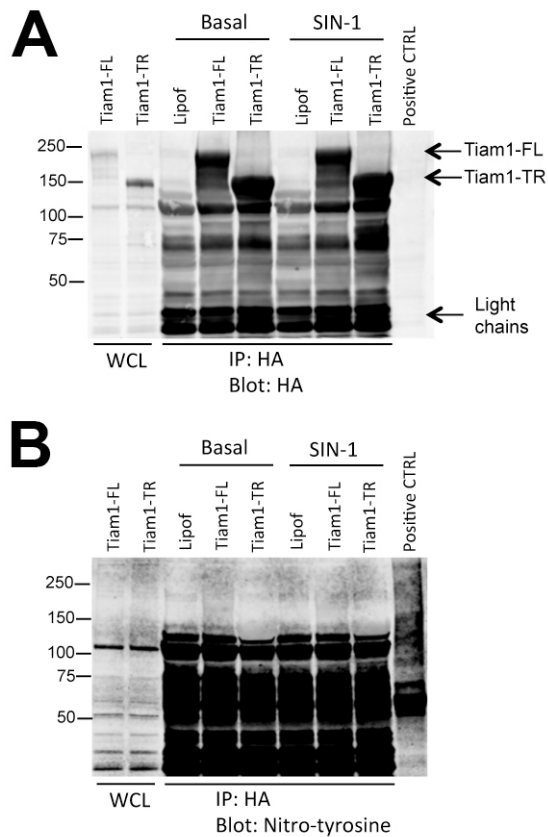

**Fig. S4.** HDMEC were transfected with control or Tiam1 siRNA and whole cell lysates Western blotted for Tiam-1. A band approximately 220kDA was reduced in by the siRNA.

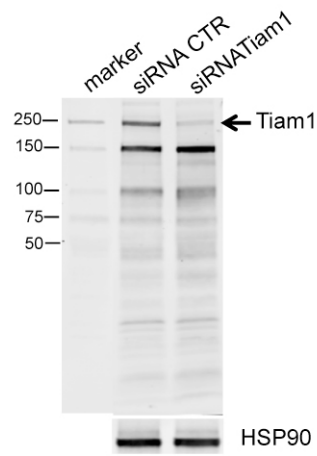

**Fig S5.** HEK293-T cells were transfected with full length (FL) or truncated at the C-terminus (TR) Tiam-1 HA-tagged. TR-Tiam-1 is the active form of Tiam-1 and localizes at the cell membrane. After 72h the cells were starved for 2h, treated with SIN-1 (100  $\mu$ M, 30') and immunoprecipitates for Tiam-1 were analyzed by immunoblotting against HA (A) and nitrated tyrosines (B).
